# Supplementary material for: The biological process of lysine‐tRNA charging is therapeutically targetable in liver cancer
Source: PubMed Central journal article supplement (PMC7820958; doi:10.1111/liv.14692), 2020-10-20
Supplement: LIV-41-206-s001.pdf [file LIV-41-206-s001.pdf]

## Supplementary Figures and Tables

# The biological process of lysine-tRNA charging is therapeutically targetable in liver cancer

Ruyi Zhang<sup>1</sup>, Lisanne Noordam<sup>1</sup>, Xumin Ou<sup>1,2\*</sup>, Buyun Ma<sup>1</sup>, Yunlong Li<sup>1</sup>, Pronay Das<sup>3</sup>, Shaojun Shi<sup>4</sup>, Jiaye Liu<sup>1</sup>, Ling Wang<sup>1</sup>, Pengfei Li<sup>1</sup>, Monique M. A. Verstegen<sup>4</sup>, D. Srinivasa Reddy<sup>3</sup>, Luc J. W. van der Laan<sup>4</sup>, Maikel P. Peppelenbosch<sup>1</sup>, Jaap Kwekkeboom<sup>1</sup>, Ron Smits<sup>1</sup>, Qiuwei Pan<sup>1\*</sup>

1. Department of Gastroenterology and Hepatology, Erasmus MC-University Medical Center, Rotterdam, The Netherlands.
2. Institute of Preventive Veterinary Medicine, Sichuan Agricultural University, Chengdu, China.
3. Organic Chemistry Division, CSIR-National Chemical Laboratory, Pune, India.
4. Department of Surgery, Erasmus MC-University Medical Center, Rotterdam, The Netherlands.

\* These authors contributed equally to this paper

## $^1\text{H}$ NMR of Cladosporin in 400 MHz

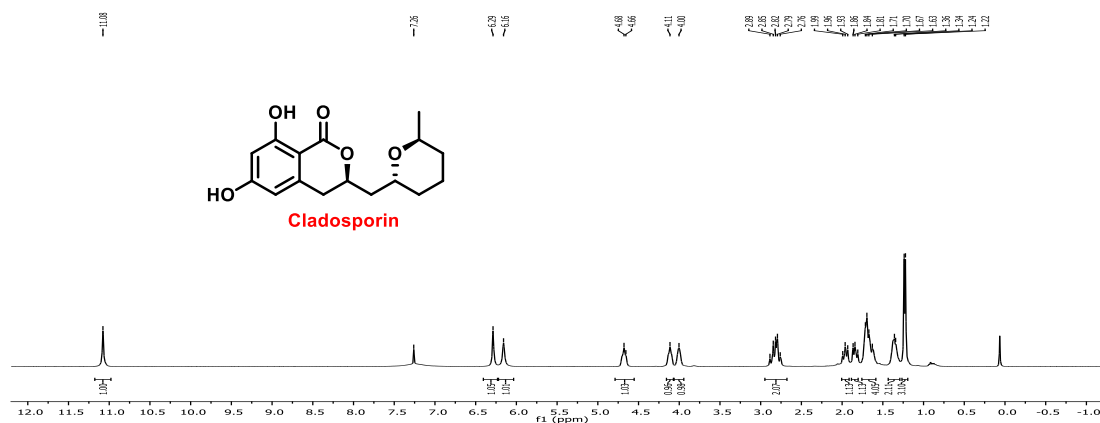

$^1\text{H}$  NMR (400 MHz,  $\text{CDCl}_3$ )  $\delta$  11.08 (s, 1H), 6.29 (s, 1H), 6.16 (s, 1H), 4.68-4.66 (m, 1H), 4.11 (s, 1H), 4.00 (s, 1H), 2.89 – 2.76 (m, 2H), 1.90 (dt,  $J = 23.0, 12.8$  Hz, 2H), 1.68 (dd,  $J = 21.9, 12.2$  Hz, 4H), 1.36 -1.34 (m, 2H), 1.23 (d,  $J = 6.4$  Hz, 3H).

## $^{13}\text{C}$ NMR of Cladosporin in 100 MHz

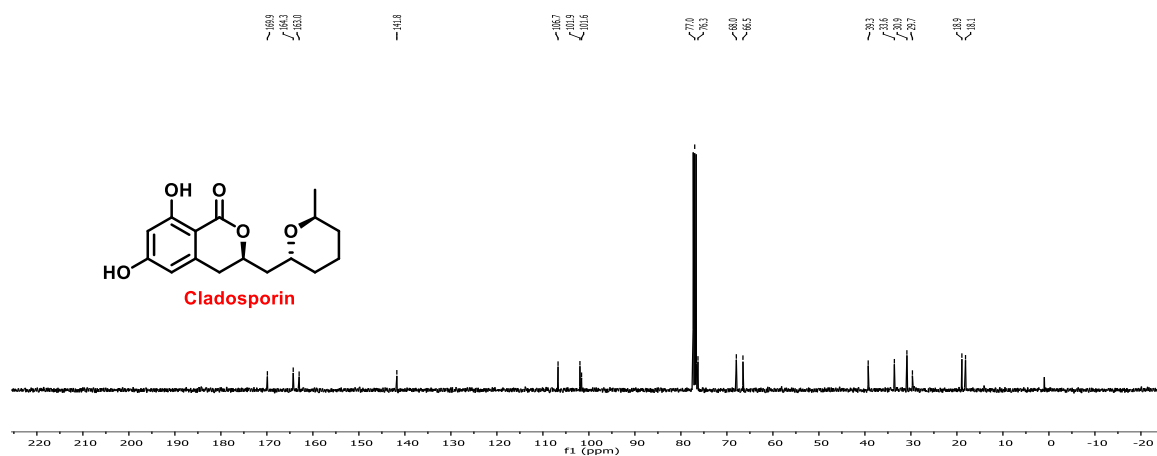

$^{13}\text{C}$  NMR (100 MHz,  $\text{CDCl}_3$ )  $\delta$  169.9, 164.3, 163.0, 141.8, 106.7, 102.0, 101.6, 76.3, 68.0, 66.5, 39.3, 33.6, 30.9, 29.7, 18.9, 18.1

## Supplementary Figure 1 NMR for Cladosporin

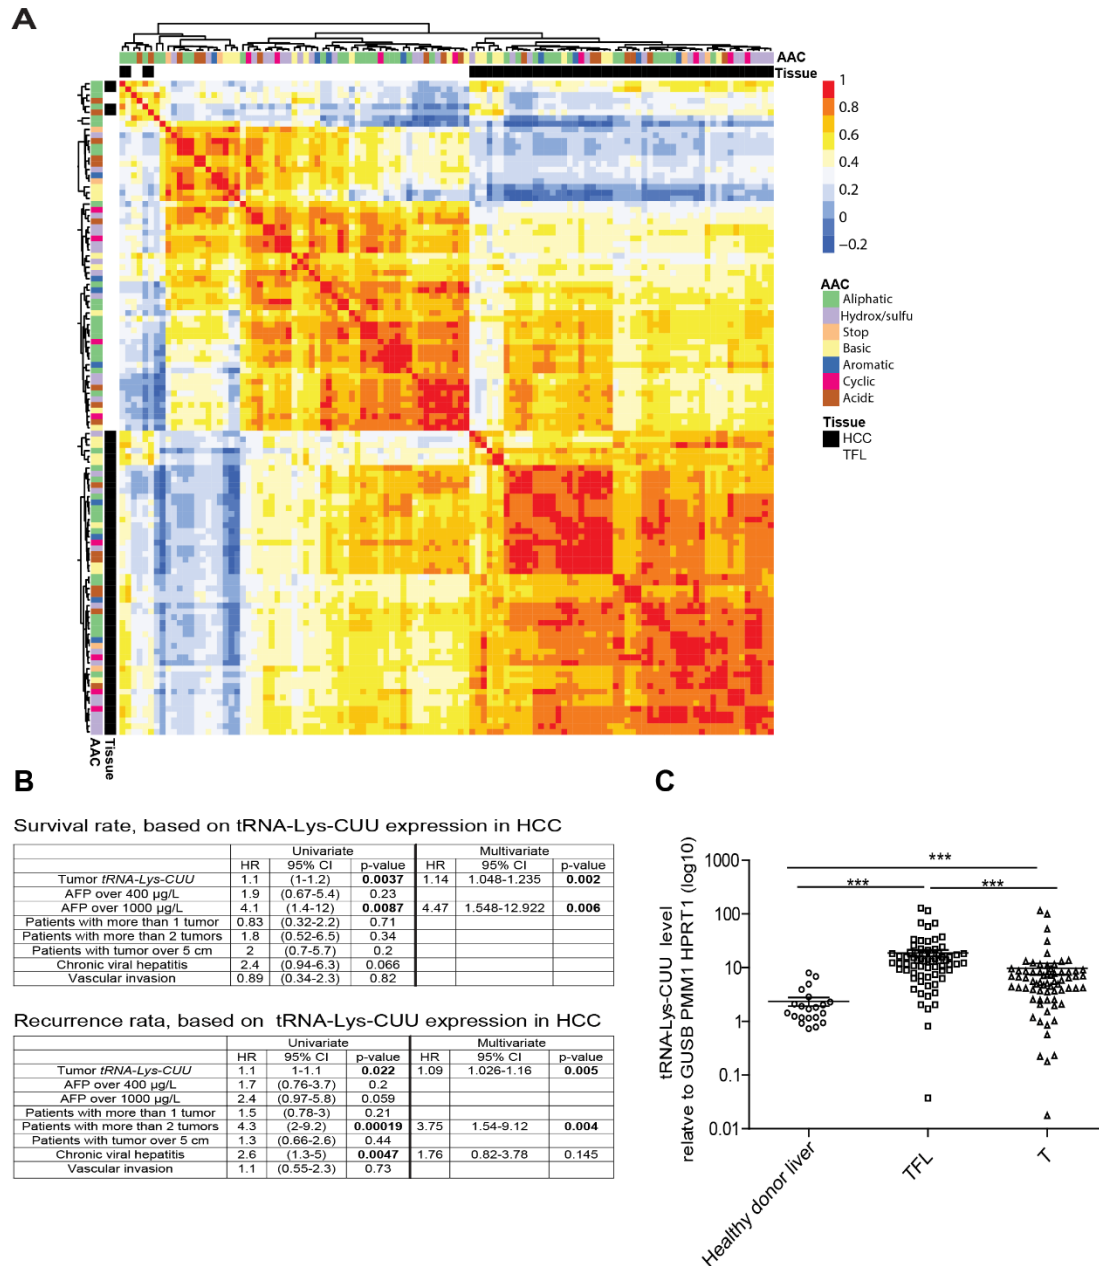

**Supplementary Figure 2** (A) Heatmap showing the correlation patterns of 57 tRNA species in 69 pairs of human HCC and TFL tissues. (B) The expression of tRNA-Lys-CUU in organ donor liver tissues (n = 21), TFL and paired HCC tissues (n = 69), respectively. (C) Univariate and multivariate analysis of associations between clinicopathological risk factors and tRNA-Lys-CUU expression in tumor tissue and HCC-specific patient survival rate and cancer recurrence rate (n=69) in our HCC patient cohort. \*\*\*P <0.001, by the Mann-Whitney test. TFL: tumor free liver; T:HCC tumor.

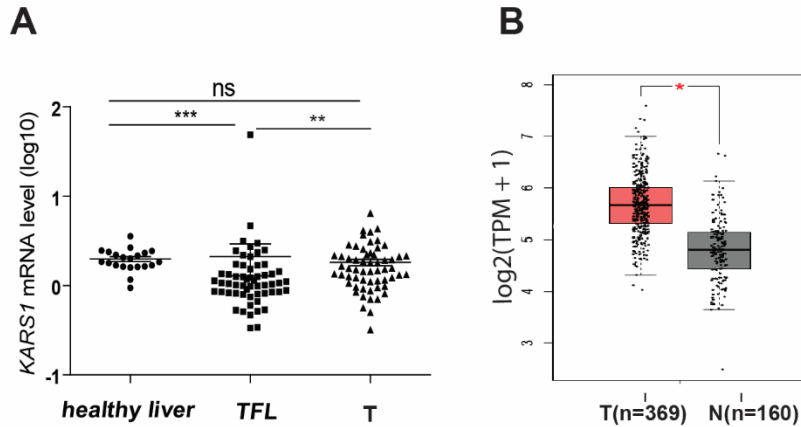

**C** Survival rate, based on *KARS1* expression in HCC

|                                  | Univariate |            |              | Multivariate |            |              |
|----------------------------------|------------|------------|--------------|--------------|------------|--------------|
|                                  | HR         | 95% CI     | p-value      | HR           | 95% CI     | p-value      |
| Tumor <i>KARS1</i>               | 1.4        | 0.96-2.1   | <b>0.078</b> | <b>1.66</b>  | 1.08-2.55  | <b>0.021</b> |
| AFP over 400 µg/L                | 1.9        | (0.67-5.4) | 0.23         |              |            |              |
| AFP over 1000 µg/L               | 4.1        | 1.4-12     | <b>0.008</b> | 5.77         | 1.86-17.94 | <b>0.002</b> |
| Patients with more than 1 tumor  | 0.78       | (0.3-2.1)  | 0.62         |              |            |              |
| Patients with more than 2 tumors | 1.8        | (0.5-6.3)  | 0.38         |              |            |              |
| Patients with tumor over 5 cm    | 2.1        | (0.74-6)   | 0.16         |              |            |              |
| Chronic viral hepatitis          | 2.4        | (0.92-6.2) | 0.073        |              |            |              |
| Vascular invasion                | 1.2        | (0.48-3.2) | 0.66         |              |            |              |

Recurrence rata, based on *KARS1* expression in HCC

|                                  | Univariate |            |         |
|----------------------------------|------------|------------|---------|
|                                  | HR         | 95% CI     | p-value |
| Tumor <i>KARS1</i>               | 0.95       | (0.66-1.3) | 0.76    |
| AFP over 400 µg/L                | 1.6        | (0.7-3.8)  | 0.26    |
| AFP over 1000 µg/L               | 2.3        | (0.88-6.1) | 0.09    |
| Patients with more than 1 tumor  | 1.4        | (0.68-2.8) | 0.38    |
| Patients with more than 2 tumors | 3.6        | (1.6-8.3)  | 0.0025  |
| Patients with tumor over 5 cm    | 1.4        | (0.68-2.9) | 0.37    |
| Chronic viral hepatitis          | 2.5        | (1.2-5)    | 0.011   |
| Vascular invasion                | 0.97       | (0.48-2)   | 0.94    |

**Supplementary Figure 3** The mRNA expression levels of *KARS1*, and their relation with clinical outcomes.

(A) The mRNA expression levels of *KARS1* in organ donor liver tissues (n = 21), TFL and paired HCC tissues(n = 59).(B)The mRNA expression data of *KARS1* from GEPIA database, and red boxplot showed HCC tumor samples (n = 369), black boxplot showed Normal healthy liver samples (n = 160). (C) Univariate and multivariate analysis of associations between clinicopathological risk factors and *KARS1* expression in tumor tissue and HCC-specific patient survival rate and cancer recurrence rate (n=59) in our HCC patient cohort. \*P<0.05; \*\*P<0.01; \*\*\*P<0.001, by the Mann-Whitney test. TFL: tumor free liver; T:HCC tumor.

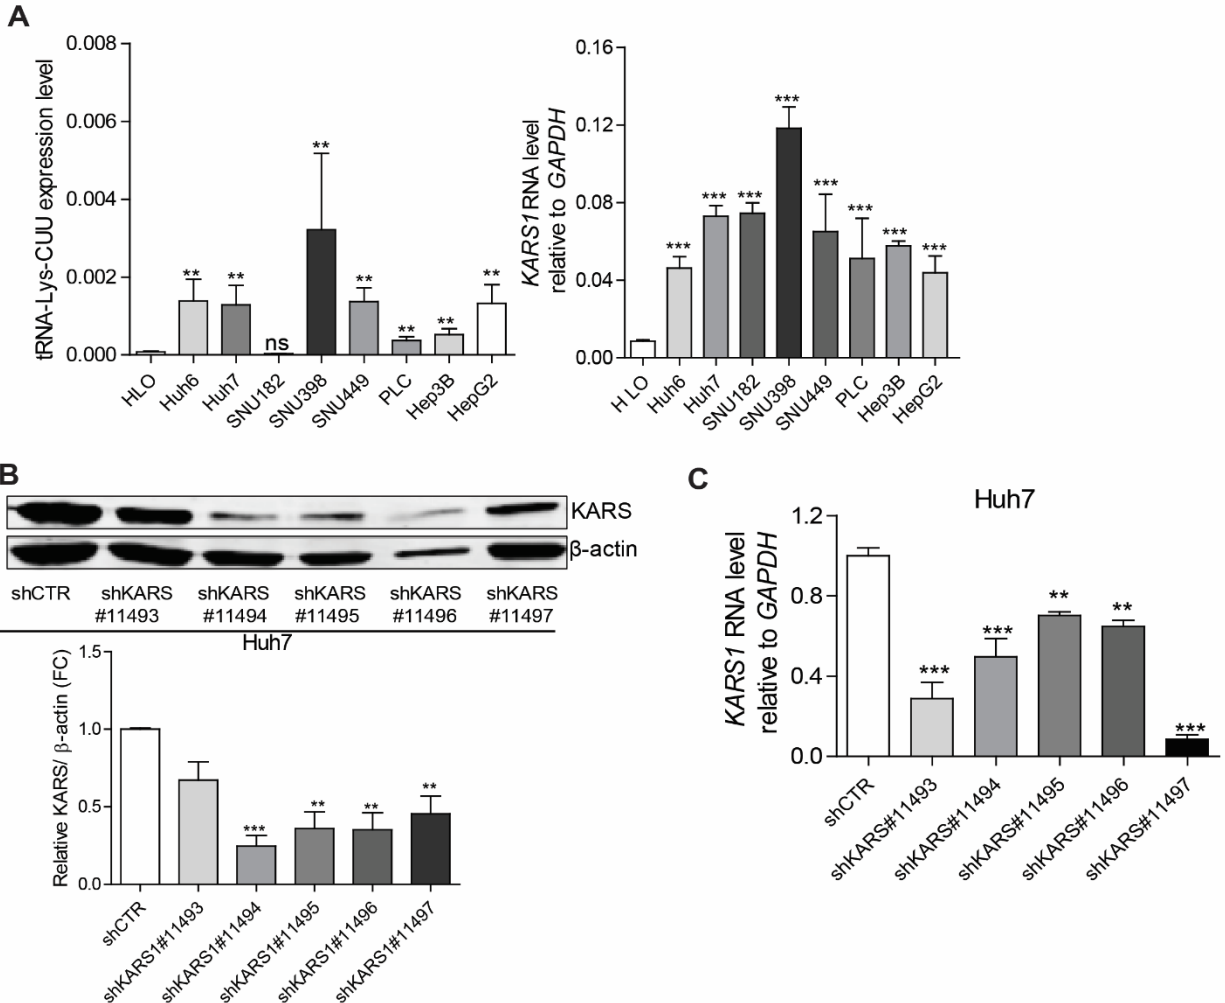

**Supplementary Figure 4** The expression level of tRNA-Lys-CUU and *KARS1*, and KARS knockdown efficiency.

(A) The expression level of tRNA-Lys-CUU (left graph) and *KARS1* (right graph) respectively, relative to GAPDH in HCC cell lines compared to normal healthy liver organoids (n = 4-7). (B-C) Knockdown in Huh7 and SNU398 was analyzed in (B) by western blot (upper graph), and the intensity was quantified relative to β-actin (lower graph) by image studio software. In (C) the expression of *KARS1* mRNA upon knockdown was determined by qRT-PCR (mean ± SEM, n = 4-9). \*\*P<0.01; \*\*\*P<0.001, by Mann-Whitney test. HLO: healthy liver organoids.

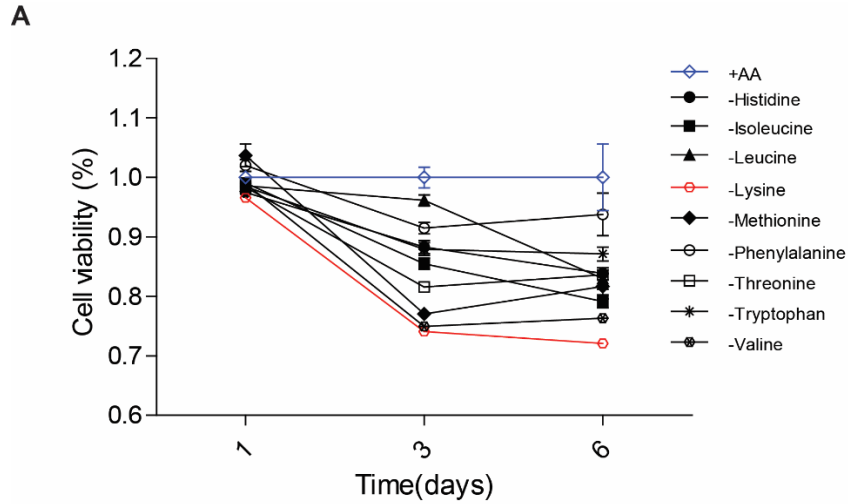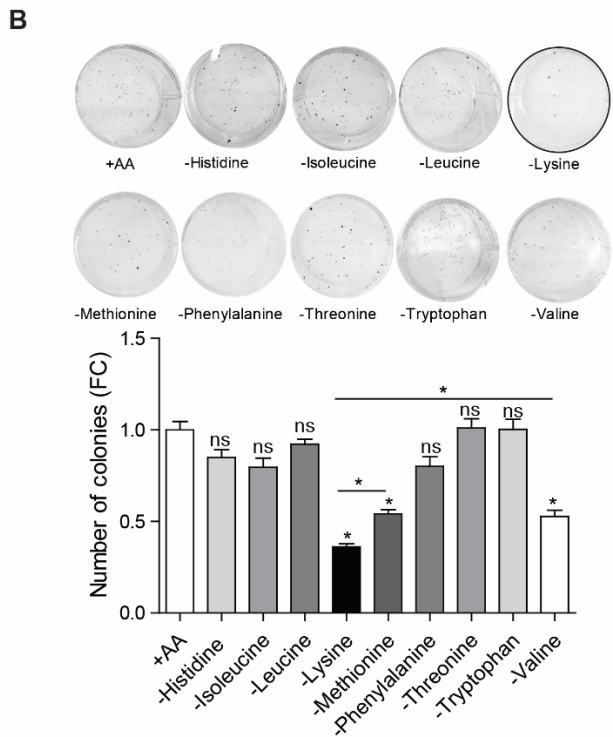

**Supplementary Figure 5** Lysine deprivation exerts the strongest inhibitory effects on HCC cell lin growth.(A) The effects of nine essential amino acid deprivation on SNU398 cell growth measured by MTT assay following 1, 3 and 6 days of culture (n = 8). (B) The effects of amino acid deprivation in SNU398 single cell-derived colony formation as assayed 2 weeks after seeding (n = 4). \*P<0.05, by the Mann-Whitney test. AA: amino acid; “-” means deprivation.

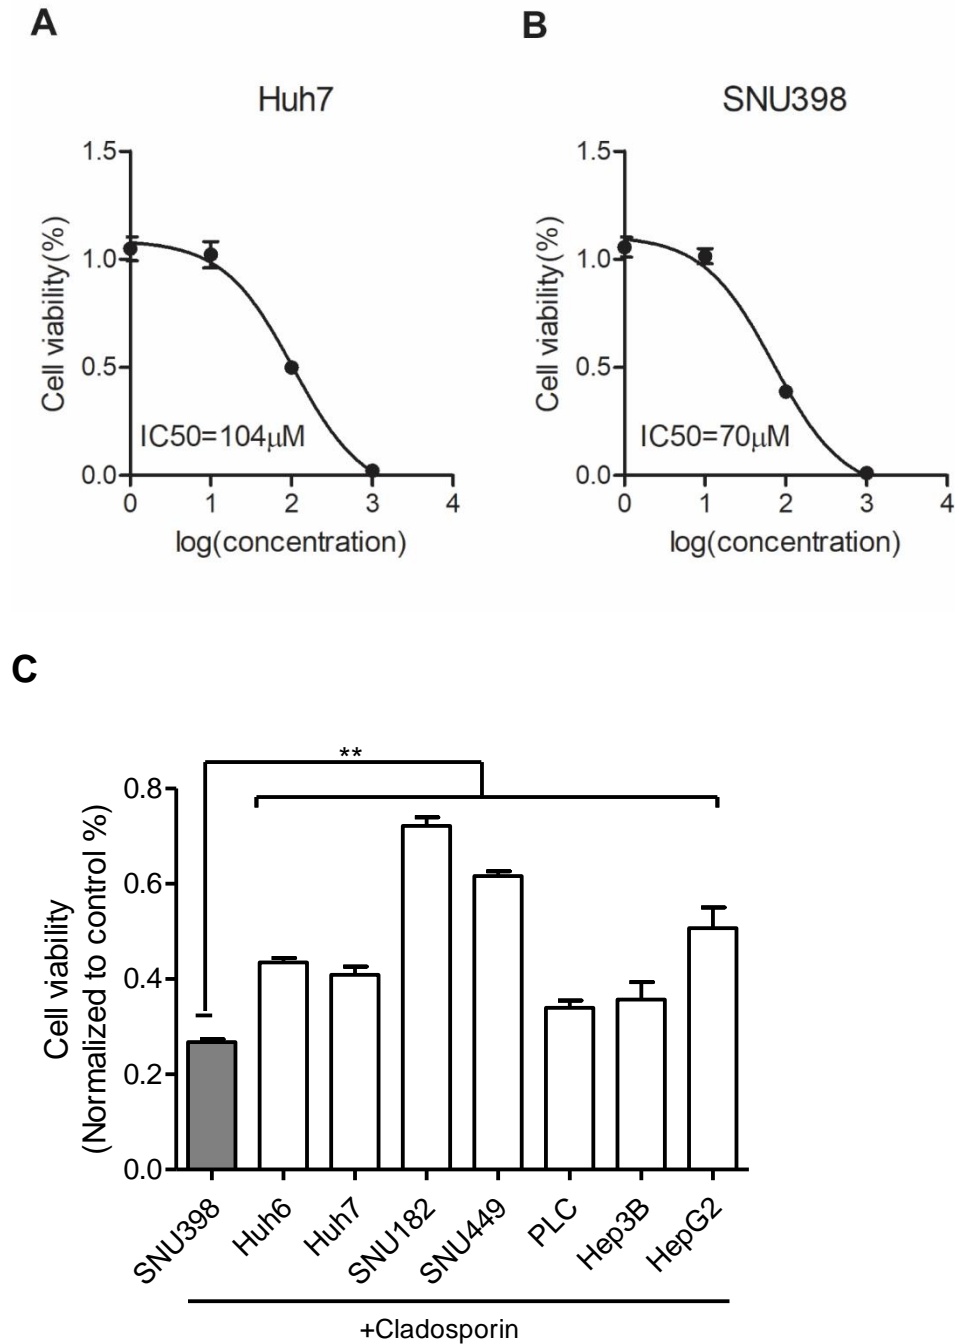

**Supplementary Figure 6** The 50% inhibitory concentration of cladosporin was determined by MTT for Huh7 (A) and SNU398 (B) cells following 3 days of treatment. The drug concentrations were 1, 10, 100 and 1000  $\mu$ M. Data are presented as mean  $\pm$  SEM. (C) SNU398 cells are more sensitive than other HCC cell lines to treatment of 100  $\mu$ M cladosporin (n = 6). \*\*P<0.01, by the Mann-Whitney test.

**A**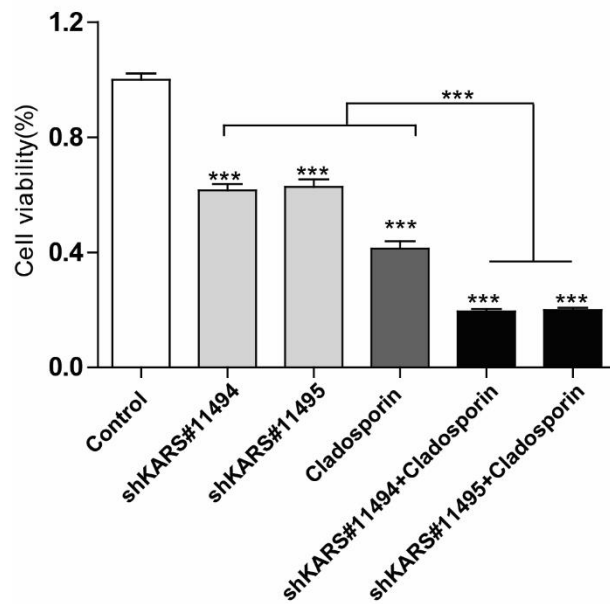**B**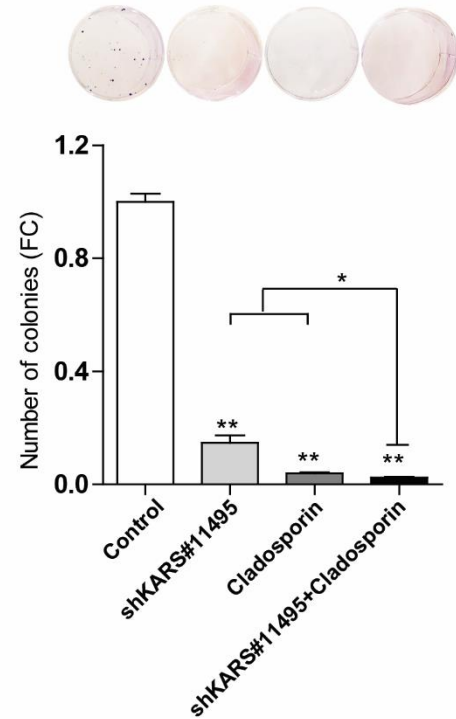

**Supplementary Figure 7** The effects of combining cladosporin treatment with KARS silencing in SNU398 cells.

Cell viability (A) and single-colony formation (B) were quantified when combining *KARS1* knockdown and cladosporin treatment (n = 4 -16). \*P<0.05; \*\*P<0.01; \*\*\*P<0.001, by the Mann-Whitney test.



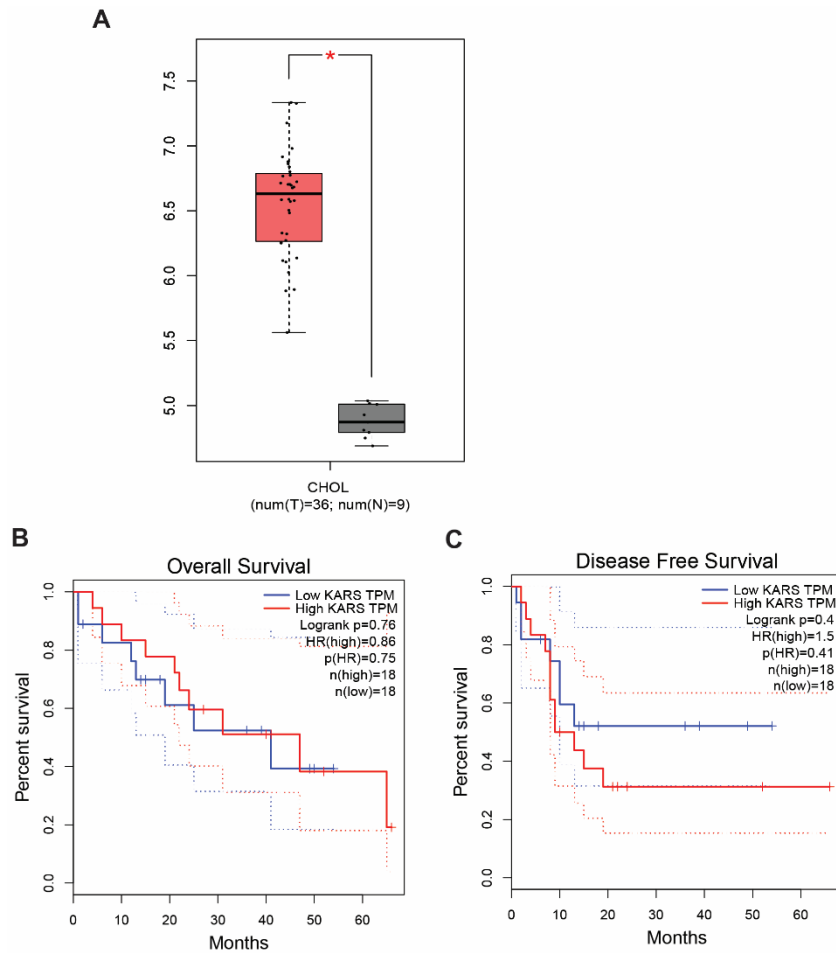

**Supplementary Figure 8** The expression level of *KARS1* and association with patient survival in cholangiocarcinoma from the GEPIA database.

(A) The boxplot shows expression level of *KARS* in CHOL (red color, n = 36). (B) and (C) indicated overall survival and disease free survival in CHOL, respectively. \*P<0.05; CHOL: cholangiocarcinoma.

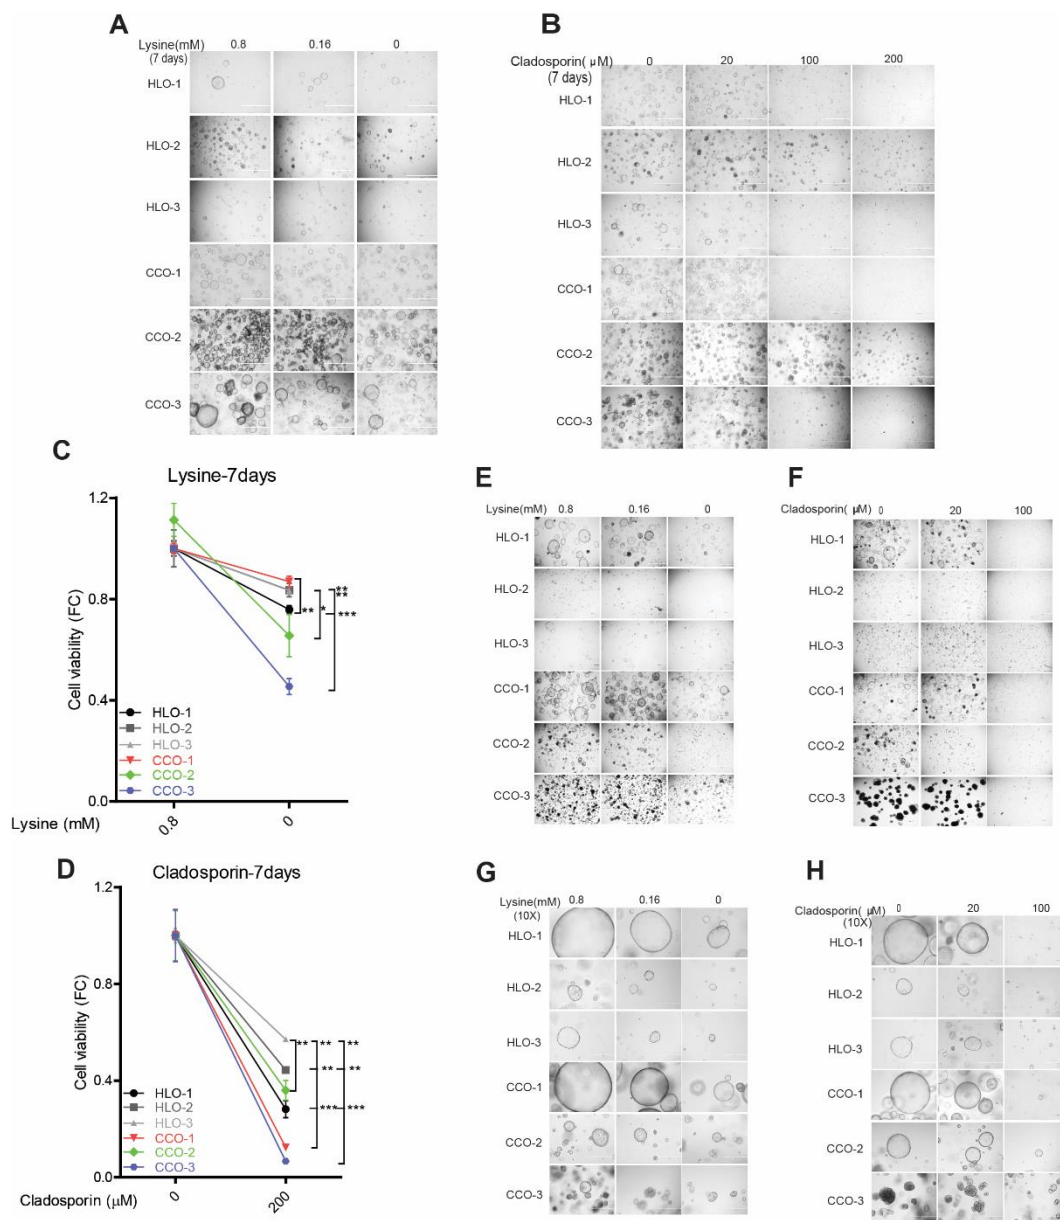

**Supplementary Figure 9** Lysine deprivation or treatment with cladosporin affects the growth of patient CC organoids.

(A-B) Images of organoids were treated with different concentrations of lysine (A) or cladosporin (B) for 7 days. (C-D) For cell viability of HLOs and CCOs were treated with lysine deprivation (C) or cladosporin 200  $\mu$ M (D), high expression of *KARS1*, CCO-3 more sensitive. (E-H) Images were taken after 14 days of culture. (G) and (H) show a 10x magnification highlighting the reduced organoid size after prolonged culture with lysine deprivation or cladosporin. CCO: cholangiocarcinoma organoid; HLO: human liver healthy organoid. \* $P < 0.05$ ; \*\* $P < 0.01$ ; \*\*\* $P < 0.001$ , by the Mann-Whitney test.

**Supplementary Table 1** Patient characteristics

| <b>Characteristic</b>                    | <b>HCC patients<br/>(n=69)</b> | <b>Healthy controls (n=21)</b> |
|------------------------------------------|--------------------------------|--------------------------------|
| <b>Age at treatment (years)</b>          |                                |                                |
| Mean ± SD                                | 60 ± 16                        | 51 ± 16.2                      |
| Median (range)                           | 64 (11-82)                     | 52 (13-88)                     |
| <b>Sex – no. (%)</b>                     |                                |                                |
| Male                                     | 41 (59.4)                      | 12 (57.1)                      |
| Female                                   | 28 (40.6)                      | 9 (42.9)                       |
| <b>Race – no. (%)</b>                    |                                |                                |
| White                                    | 58 (84.1)                      | -                              |
| African                                  | 6 (8.7)                        | -                              |
| Asian                                    | 4 (5.8)                        | -                              |
| Not reported                             | 1 (1.4)                        | 21 (100)                       |
| <b>Etiology – no. (%)</b>                |                                |                                |
| No known liver disease                   | 20 (29.0)                      | NA                             |
| Alcohol                                  | 16 (23.2)                      | NA                             |
| NASH                                     | 8 (11.6)                       | NA                             |
| Hepatitis B                              | 8 (11.6)                       | NA                             |
| Hepatitis C + Alcohol                    | 5 (7.2)                        | NA                             |
| Hepatitis B +<br>Alc/HepC/HepD/NASH      | 4 (5.8)                        | NA                             |
| Hepatitis C                              | 4 (5.8)                        | NA                             |
| Fibrolamellar HCC                        | 3 (4.4)                        | NA                             |
| Other                                    | 1 (1.5)                        | NA                             |
| <b>Hepatitis status – no. (%)</b>        |                                |                                |
| Hepatitis B or C positive                | 21 (30.4)                      | 0 (0)                          |
| Chronic Hepatitis B                      | 12 (17.4)                      | 0 (0)                          |
| Chronic Hepatitis C                      | 10 (14.5)                      | 0 (0)                          |
| <b>Cirrhosis – no. (%)</b>               |                                |                                |
| Yes                                      | 50 (72.5)                      | 0 (0)                          |
| No                                       | 19 (27.5)                      | 21 (100)                       |
| <b>Differentiation grade – no. (%)</b>   |                                |                                |
| Good                                     | 8 (11.6)                       | NA                             |
| Moderate                                 | 35 (50.7)                      | NA                             |
| Poor                                     | 14 (20.3)                      | NA                             |
| Unknown                                  | 12 (17.4)                      | NA                             |
| <b>Number of lesions – no. (%)</b>       |                                |                                |
| 1                                        | 38 (55.1)                      | NA                             |
| >1                                       | 31 (44.9)                      | NA                             |
| Median (range)                           | 1 (1-11)                       | NA                             |
| <b>Size of largest lesion (cm)</b>       |                                |                                |
| Mean ± SD                                | 7.5 ± 5.1                      | NA                             |
| Median (range)                           | 6.2 (1-24)                     | NA                             |
| <b>AFP level before resection (ug/l)</b> |                                |                                |
| Mean ± SD                                | 46679.2 ± 375310.5             | NA                             |
| Median (range)                           | 9 (1-3118700)                  | NA                             |

## Supplementary Table 2 shRNA target sequences

| id    | symbol | targetTaxonId | targetSeq             | geneDesc              | oligoSeq                                                       | NCBI_genelid              | cloneName | vectorId |
|-------|--------|---------------|-----------------------|-----------------------|----------------------------------------------------------------|---------------------------|-----------|----------|
| 11493 | KARS   | human         | CGGCGAATCAACATGGTAGAA | lysyl-tRNA synthetase | CCGGCGGCGAATCAACATGGTAGAACTCGA<br>GTTCTACCATGTTGATTCGCCGTTTTTG | 3735 NM_005548.1-1214s1c1 | pLKO.1    |          |
| 11494 | KARS   | human         | GCCTTTCATCACTTATCACAA | lysyl-tRNA synthetase | CCGGGCCTTTCATCACTTATCACAACTCGAG<br>TTGTGATAAGTGATGAAAGGCTTTTTG | 3735 NM_005548.1-883s1c1  | pLKO.1    |          |
| 11495 | KARS   | human         | CCTGGAAGTGACTTGCATCAA | lysyl-tRNA synthetase | CCGGCCTGGAAGTGACTTGCATCAACTCGA<br>GTTGATGCAAGTCACCTCCAGGTTTTTG | 3735 NM_005548.1-1393s1c1 | pLKO.1    |          |
| 11496 | KARS   | human         | CGTGGACCCAAATCAATACTA | lysyl-tRNA synthetase | CCGGCGTGGACCCAAATCAATACTACTCGA<br>GTAGTATTGATTGGGTCCACGTTTTTG  | 3735 NM_005548.1-250s1c1  | pLKO.1    |          |
| 11497 | KARS   | human         | CCAGAGATACTGGACTTGAT  | lysyl-tRNA synthetase | CCGGCCAGAGATACTGGACTTGATCTCGA<br>GATCAAGTCCAAGTATCTCTGTTTTTG   | 3735 NM_005548.1-724s1c1  | pLKO.1    |          |

## Supplementary Table 3 Primer sequences

| Genes        | Forward primers (5'-3')    | Reverse primer (5'-3')       |
|--------------|----------------------------|------------------------------|
| <i>KARS1</i> | GACGCACAATCCTGAGTTCACC     | AGGTGACCTTGTAAGTGCCTGTA      |
| <i>GUSB</i>  | CAGGTGATGGAAGAAGTGG        | GTTGCTCACAAAGGTCACAG         |
| <i>HPRT1</i> | GCTATAAATTCTTTGCTGACCTGCTG | AATTACTTTTATGTCCCCTGTTGACTGG |
| <i>PMM1</i>  | CGAGTTCTCCGAAGTGGAC        | CTGTTTTTCAGGGCTTCCAC         |
| <i>GAPDH</i> | GTCTCCTCTGACTTCAACAGCG     | ACCACCCTGTTGCTGTAGCCAA       |

### Supplementary Table 4 List of tRNA expression comparison

Differences of tRNA expression between tumor and TFL patient tissues (n=69) were analyzed using the Wilcoxon matched pairs test. \*P<0.05, \*\*P<0.01, \*\*\*P<0.001. TFL:tumor-free liver. Red: significant up-regulation in tumor; Green: significant down-regulation in tumor; Black: no significant difference.

| Gene                | Mean         |              | Wilcoxon matched pairs test | Gene         | Mean  |       | Wilcoxon matched pairs test |
|---------------------|--------------|--------------|-----------------------------|--------------|-------|-------|-----------------------------|
|                     | TFL          | Tumor        |                             |              | TFL   | Tumor |                             |
| tRNA-Leu-CAA        | 1.522        | 1.277        | ***                         | tRNA-Gly-GCC | 197.2 | 603.3 | ***                         |
| tRNA-Leu-CAG        | 5.106        | 3.551        | ***                         | tRNA-Ser-AGA | 2.547 | 2.894 | ***                         |
| tRNA-Ile-AAU        | 1.37         | 1.254        | ***                         | tRNA-Leu-AAG | 6.162 | 8.093 | **                          |
| tRNA-Ile-GAU        | 1.076        | 0.8677       | ***                         | tRNA-Leu-UAG | 8.082 | 8.548 | **                          |
| tRNA-iMet-CAU       | 13.49        | 12.49        | ***                         | tRNA-Pro-UGG | 3.571 | 3.923 | **                          |
| tRNA-Met-CAU        | 6.762        | 5.325        | ***                         | tRNA-Trp-CCA | 4.311 | 5.186 | **                          |
| tRNA-Stop-UUA       | 5.32         | 4.172        | ***                         | tRNA-Glu-CUC | 2.303 | 3.733 | *                           |
| tRNA-His-GUG        | 16.01        | 13.99        | ***                         | tRNA-Gly-UCC | 1.371 | 3.731 | *                           |
| tRNA-Phe-GAA        | 1.095        | 0.801        | ***                         | tRNA-Leu-UAA | 4.735 | 5.492 | ns                          |
| tRNA-Val-AAC        | 1.8          | 0.6382       | ***                         | tRNA-Ser-UGA | 4.997 | 5.848 | ns                          |
| tRNA-Val-CAC        | 2.248        | 0.7724       | ***                         | tRNA-Ser-GCU | 3.642 | 4.028 | ns                          |
| tRNA-Pro-GGG        | 0.6167       | 0.4805       | ***                         | tRNA-Arg-CCU | 1.474 | 1.573 | ns                          |
| tRNA-Pro-CGG        | 4.063        | 3.23         | ***                         |              |       |       |                             |
| tRNA-Thr-AGU        | 0.748        | 0.5531       | ***                         |              |       |       |                             |
| tRNA-Thr-UGU        | 2.64         | 1.922        | ***                         |              |       |       |                             |
| tRNA-Thr-CGU        | 1.107        | 0.7374       | ***                         |              |       |       |                             |
| tRNA-Ala-CGC        | 10.14        | 4.745        | ***                         |              |       |       |                             |
| tRNA-Ala-GGC        | 3.448        | 1.932        | ***                         |              |       |       |                             |
| tRNA-Ala-UGC        | 8.042        | 4.49         | ***                         |              |       |       |                             |
| tRNA-Ala-AGC        | 1.779        | 1.098        | ***                         |              |       |       |                             |
| tRNA-Tyr-AUA        | 1.429        | 1.227        | ***                         |              |       |       |                             |
| tRNA-Tyr-GUA        | 5.609        | 2.763        | ***                         |              |       |       |                             |
| tRNA-Stop-CUA       | 5.562        | 2.651        | ***                         |              |       |       |                             |
| tRNA-Asn-AUU        | 2.535        | 1.669        | ***                         |              |       |       |                             |
| tRNA-Lys-UUU        | 18.79        | 9.738        | ***                         |              |       |       |                             |
| <b>tRNA-Lys-CUU</b> | <b>6.867</b> | <b>3.389</b> | <b>***</b>                  |              |       |       |                             |
| tRNA-Asp-AUC        | 4.942        | 2.412        | ***                         |              |       |       |                             |
| tRNA-Asp-GUC        | 0.8559       | 0.6074       | ***                         |              |       |       |                             |
| tRNA-Glu-UUC        | 0.9868       | 0.753        | ***                         |              |       |       |                             |
| tRNA-Cys-GCA        | 4.178        | 3.506        | ***                         |              |       |       |                             |
| tRNA-Arg-ACG        | 0.8352       | 0.6351       | ***                         |              |       |       |                             |
| tRNA-Arg-CCG        | 2.109        | 1.783        | ***                         |              |       |       |                             |
| tRNA-Ser-ACU        | 1.497        | 1.283        | ***                         |              |       |       |                             |
| tRNA-seCys-UCA      | 3.942        | 3.471        | ***                         |              |       |       |                             |
| tRNA-Val-UAC        | 1.783        | 0.4871       | **                          |              |       |       |                             |
| tRNA-Ser-CGA        | 5.424        | 5.389        | **                          |              |       |       |                             |
| tRNA-Pro-AGG        | 1.317        | 1.246        | **                          |              |       |       |                             |
| tRNA-Gln-CUG        | 18.07        | 12.53        | **                          |              |       |       |                             |
| tRNA-Cys-ACA        | 0.8275       | 0.4544       | **                          |              |       |       |                             |
| tRNA-Arg-UCG        | 0.682        | 0.5212       | **                          |              |       |       |                             |
| tRNA-Ile-UAU        | 2.046        | 1.529        | ns                          |              |       |       |                             |
| tRNA-Gln-UUG        | 18.85        | 14.06        | ns                          |              |       |       |                             |
| tRNA-Asn-GUU        | 0.4828       | 0.3918       | ns                          |              |       |       |                             |
| tRNA-Arg-UCU        | 0.7006       | 0.6279       | ns                          |              |       |       |                             |
| tRNA-Gly-CCC        | 0.4193       | 0.3827       | ns                          |              |       |       |                             |
